# Supplementary material
Source: Springer Nature journal article supplement (https://www.springermedizin.de/resource/supplementary/12879_2011_1616_MOESM4_ESM.pdf/9442942)

Sensitivity

SROC Curve

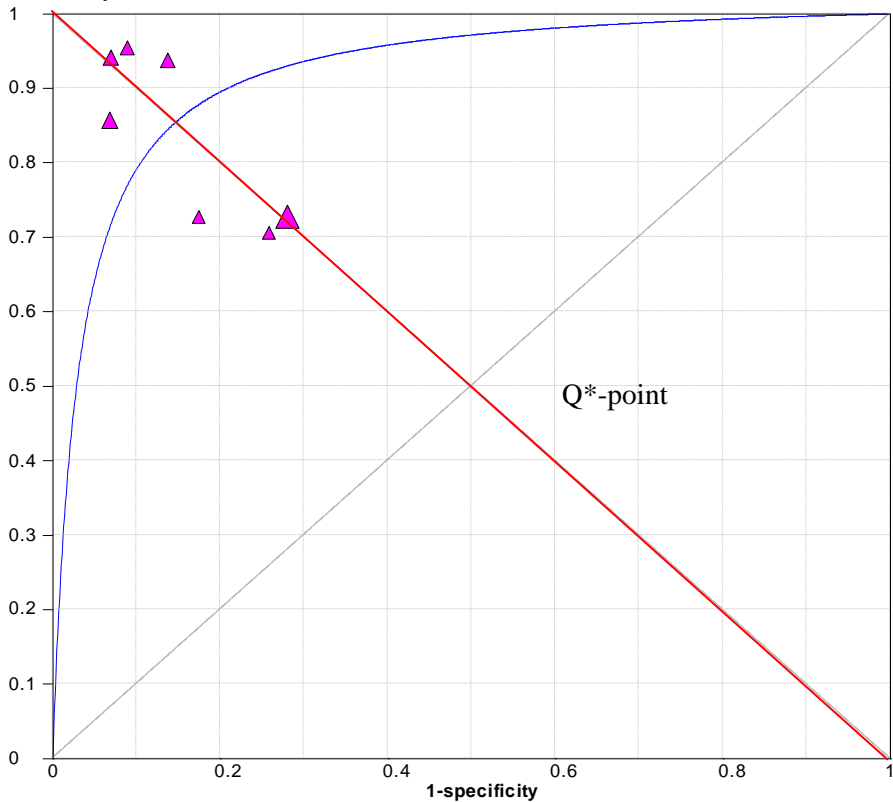

**Symmetric SROC**  
AUC = 0.9205  
SE(AUC) = 0.0333  
Q\* = 0.8540  
SE(Q\*) = 0.0383

Q\*-point

Supplement: MOESM4 [file 9442942]
